# Supplementary material for: Synthesis and characterization of ion imprinted polymeric nanoparticles for selective extraction and determination of mercury ions
Source: Royal Society of Chemistry journal article supplement (doi:10.1039/c5ay02545a), 2015-01-01
Supplement: c5ay02545a1.pdf [file c5ay02545a1.pdf]

## Electronic Supplementary Information

**Table ESI 1**

The graphite furnace temperature program for mercury determination

| Step        | Temperature (°C) | Ramp time (s) | Hold time (s) |
|-------------|------------------|---------------|---------------|
| Drying      | 90               | 5             | 20            |
| Drying      | 105              | 3             | 20            |
| Drying      | 110              | 2             | 10            |
| Pyrolysis   | 300              | 250           | 10            |
| AZ*         | 300              | 0             | 4             |
| Atomization | 1000             | 1500          | 3             |
| Clean out   | 2300             | 500           | 4             |

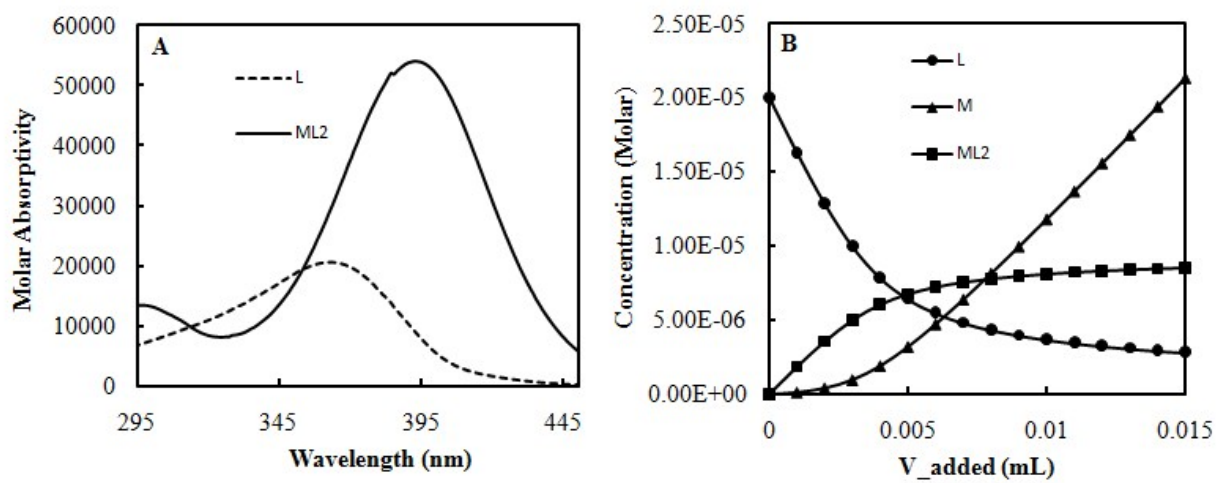

**Fig. ESI 1** Spectral (A) and concentration (B) profiles for the species in the complex formation between mercury and ligand.

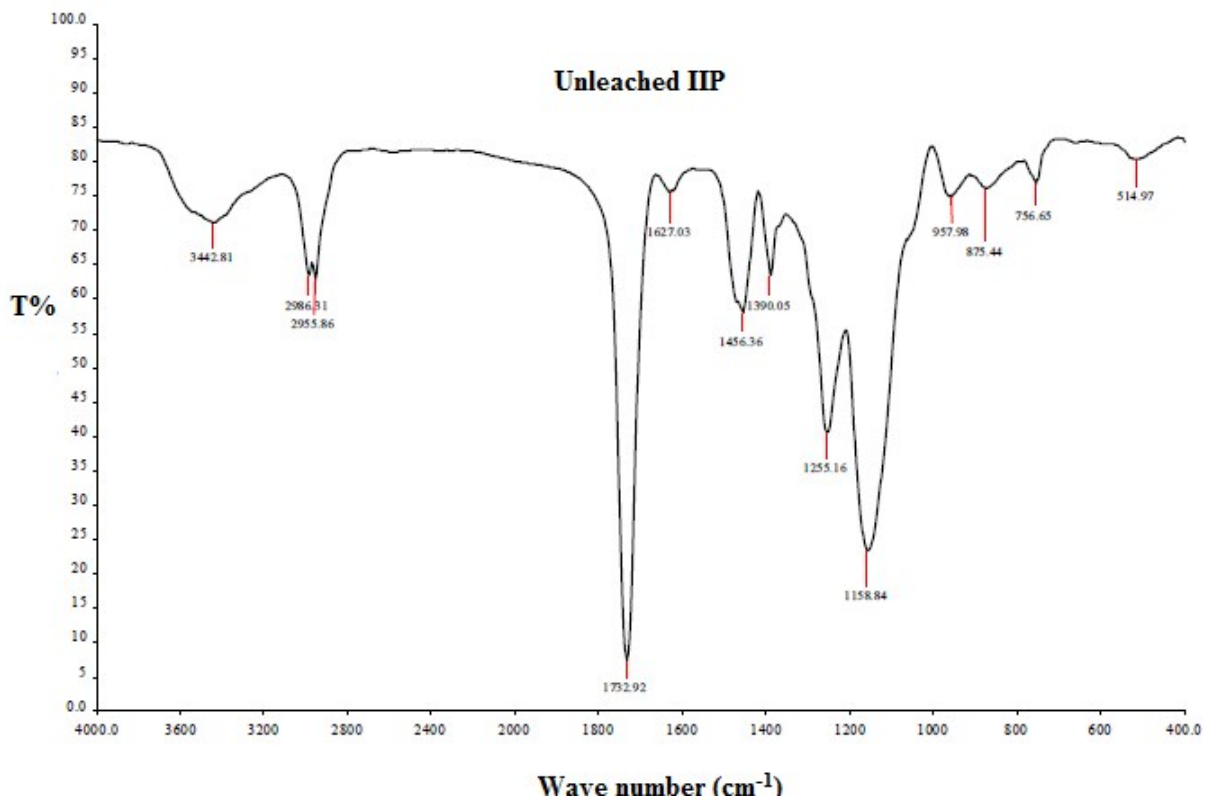

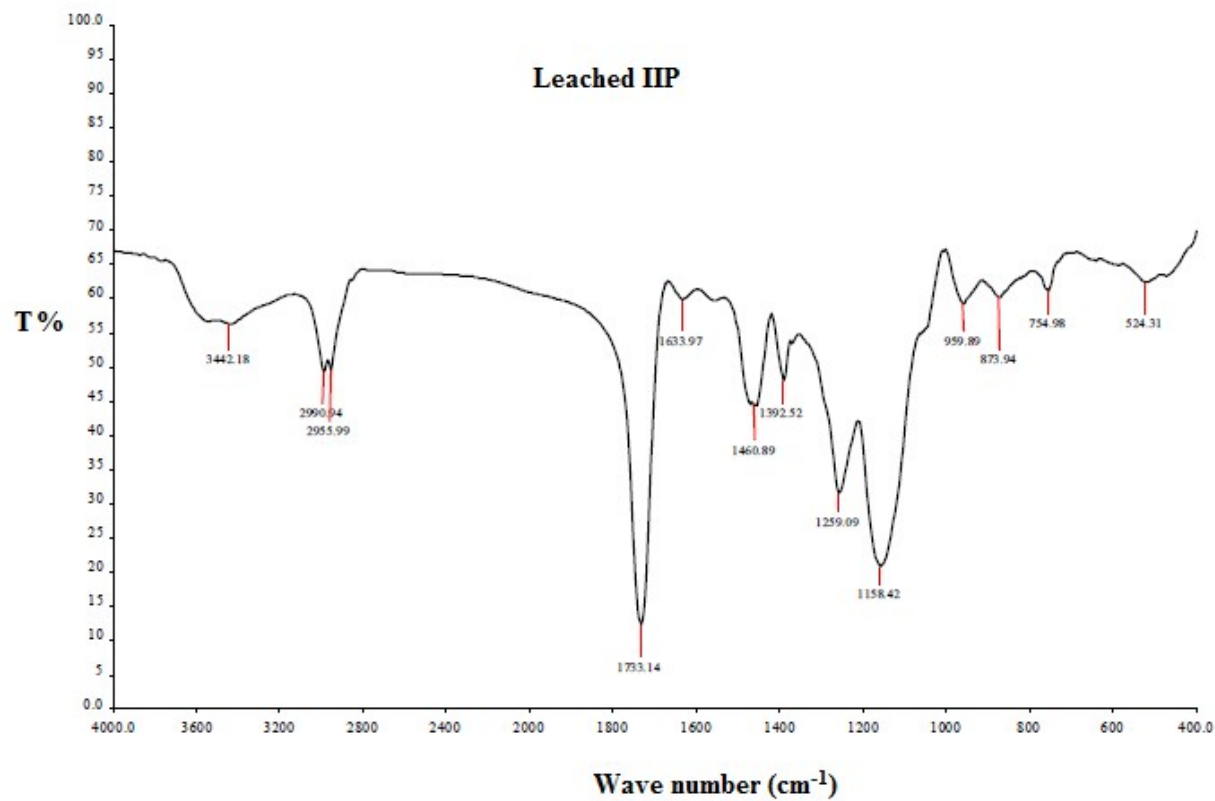

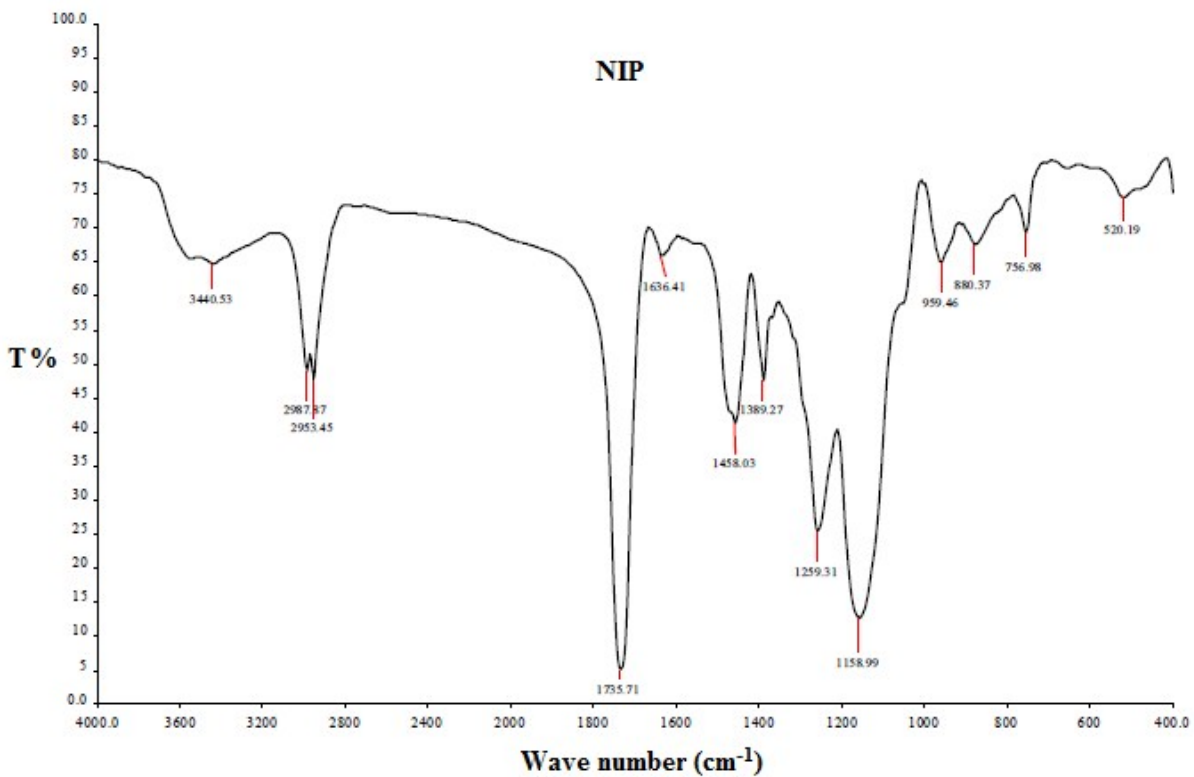

Fig. ESI 2 FT-IR spectra of leached, unleached and non-imprinted polymers.

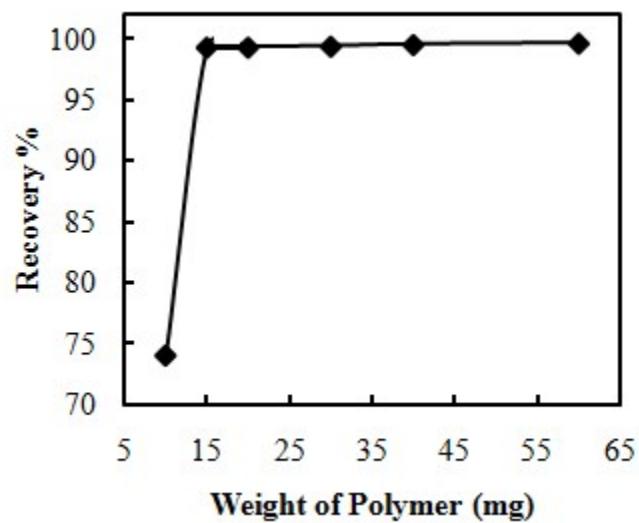

**Fig. ESI 3** Effect of polymer particles weight on the pre-concentration of mercury ions.

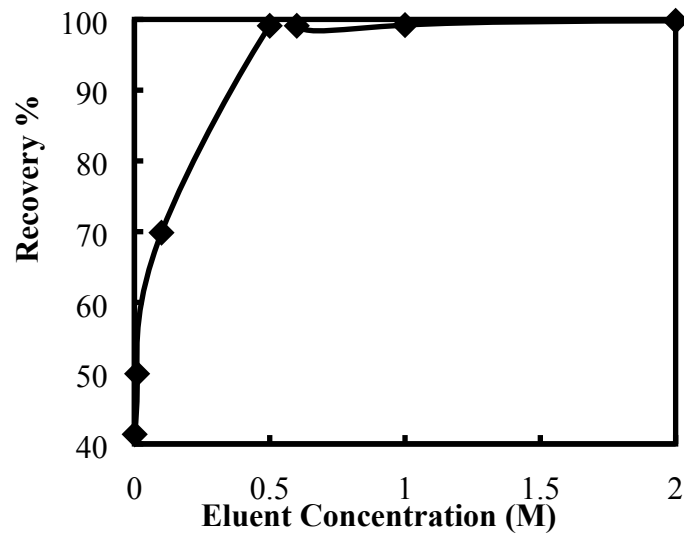

**Fig. ESI 4** Influence of eluent concentration.
